# Supplementary material for: Difference in the recruitment of intrinsic foot muscles in the elderly under static and dynamic postural conditions
Source: PeerJ. 2023 Jul 19;11:e15719. doi: 10.7717/peerj.15719 (PMC10362842; doi:10.7717/peerj.15719)
Supplement: Supplemental Information 1 — 41 represents the condition of forward-side task, 43 represents the condition of dominant-side task, 45 represents the condition of backward -side task, and the 47 represents the condition of non-dominant-side task. TL, Total length; SA, Sway area; AP, antero–posterior sway; ML, medio-lateral sway. [file peerj-11-15719-s001.xlsx]

## Sheet: Sheet1
Subject No.	condition of LOS test	activation of AbH	activation of FDB	COP TL	COP SA	COP AP	COP ML
1031	41	0.428484	0.580077	29.932	19.091	9.58	1.43
1031	43	0.199956	0.592458	27.366	48.383	3.04	10.25
1031	45	0.197638	0.477694	31.928	30.344	7.28	1.52
1031	47	0.224707	0.308037	30.396	53.354	7.68	8.79
1041	41	0.919457	0.830461	56.11	35.53	9.75	1.55
1041	43	0.689382	0.958839	50.849	92.791	2.92	14.36
1041	45	0.577178	0.647645	53.758	54.385	8.47	1.32
1041	47	0.508206	0.470083	50.217	106.34	3.6	13.71
1151	41	0.97029	1.05797	41.244	41.332	8.86	3.1
1151	43	0.40969	0.588096	50.881	94.689	3.71	11.94
1151	45	0.544541	0.907506	35.345	31.811	5.53	1.18
1151	47	0.300983	0.685276	45.758	67.065	3.19	11.41
1171	41	0.717455	0.911711	46.895	59.969	15.48	1.84
1171	43	0.385577	0.55549	53.278	150.75	5.04	16.41
1171	45	0.326434	0.439068	62.643	101.51	11.73	4.85
1171	47	0.0425106	0.129514	84.37	181.11	10.4	16.04
2101	41	0.319925	0.530785	30.339	32.488	9.62	2.79
2101	43	0.102141	0.356569	34.499	65.99	3.22	11.95
2101	45	0.0397082	0.216118	31.873	47.914	6.68	3.02
2101	47	0.0179017	0.105277	30.448	51.953	2.6	11.34
2111	41	0.411518	0.360229	30.229	29.977	11.1	0.87
2111	43	0.0495474	0.169646	30.596	36.333	1.67	11.36
2111	45	0.0143485	0.0499079	39.755	33.692	7.67	1.49
2111	47	0.0118021	0.02706	34.637	63.572	2.85	11.67
2141	41	0.674947	0.365563	35.512	30.284	10.29	1.45
2141	43	0.558018	0.369157	30.567	46.818	3.08	13.26
2141	45	0.324644	0.194653	30.826	32.355	7.2	1.6
2141	47	0.101831	0.0798175	31.543	54.928	1.39	12.63
2171	41	0.702515	0.73142	36.902	20.75	9	1.32
2171	43	0.564586	0.831202	46.844	112.73	6.62	13.43
2171	45	0.308435	0.467465	33.563	28.352	7.24	1.2
2171	47	0.172013	0.450766	45.439	80.786	2.77	15.04
3091	41	0.42295	0.370149	21.467	14.409	6.74	0.6
3091	43	0.144602	0.196882	27.788	41.065	1.9	10.5
3091	45	0.0617298	0.191617	21.765	17.679	4.84	1.4
3091	47	0.0910875	0.190602	30.109	51.169	2.69	9.59
3111	41	0.860865	0.858274	37.894	33.412	8.98	2.1
3111	43	0.16633	0.508285	35.824	49.944	2.03	10.63
3111	45	0.145334	0.467718	28.198	26.657	5.87	1.26
3111	47	0.0817893	0.361868	37.275	66.655	2.53	11.19
3141	41	0.556334	0.476237	23.746	19	9.68	1.58
3141	43	0.228634	0.266286	22.66	31.918	1.17	9.5
3141	45	0.033802	0.0925661	30.406	22.463	6.7	2.68
3141	47	0.0325894	0.180225	25.006	43.474	3.72	10.32
4061	41	0.309766	0.266667	27.686	12.104	5.45	1.03
4061	43	0.208458	0.427225	37.137	73.325	3.82	8.98
4061	45	0.0643664	0.335569	31.369	39.176	3.61	3.59
4061	47	0.080972	0.371781	31.202	51.214	2.34	9.54
4131	41	0.161611	0.199705	22.334	7.075	5.37	0.26
4131	43	0.049773	0.0999418	21.785	28.429	2.23	6.85
4131	45	0.119397	0.220173	25.578	29.537	3.69	1.5
4131	47	0.0585448	0.0439908	19.56	25.653	1.15	6.23
5042	41	0.704917	0.809612	33.323	19.475	9.21	1.89
5042	43	0.17364	0.483786	32.975	48.262	2.06	10.62
5042	45	0.172335	0.217026	25.288	18.986	4.39	0.79
5042	47	0.0325065	0.0638279	32.516	66.158	2.82	10.42
5062	41	0.647684	0.732377	36.013	38.019	12.36	1.83
5062	43	0.147021	0.49563	60.334	158.52	8.7	17.67
5062	45	0.144178	0.621195	50.249	47.947	8.68	4.19
5062	47	0.135158	0.311076	46.999	119.53	5.6	16.75
5082	41	0.701517	0.87114	31.01	33.973	11.73	1.92
5082	43	0.207967	0.52781	46.24	101.51	6.89	16.33
5082	45	0.553455	0.750034	37.783	43.244	9.56	2.09
5082	47	0.0747638	0.238436	32.483	59.203	2.14	14.47
5092	41	0.41513	0.582162	38.234	35.071	7.95	1.88
5092	43	0.162707	0.512074	46.07	85.886	2.78	12.43
5092	45	0.13077	0.512654	44.983	43.458	7.81	1.95
5092	47	0.0778228	0.215205	63.627	94.46	7.22	11.02
5102	41	0.905292	0.912859	58.077	56.327	13.54	1.68
5102	43	0.203469	0.692287	53.677	140.6	5.44	15.31
5102	45	0.131645	0.630969	51.573	52.325	10.04	1.84
5102	47	0.0501905	0.129441	48.185	102.49	2.79	13.87
5112	41	0.350394	0.516075	34.308	37.427	9.04	2.12
5112	43	0.0128385	0.0895595	45.245	58.247	4.39	10.14
5112	45	0.124844	0.13148	39.024	38.669	4.41	3.21
5112	47	0.14347	0.18569	56.625	48.113	2.77	9.2
5142	41	0.578444	0.536692	38.659	31.75	9.77	1.69
5142	43	0.234863	0.20488	34.366	66.975	1.93	12.45
5142	45	0.235735	0.717472	40.095	47.064	8.15	2.43
5142	47	0.0613215	0.153828	44.812	99.195	3.07	14.16
5152	41	0.311689	0.795519	30.637	24.272	8.66	1.35
5152	43	0.156623	0.312723	28.04	35.222	3.99	8.14
5152	45	0.0555185	0.242957	26.081	33.003	5.99	1.61
5152	47	0.0199761	0.0926367	25.433	36.726	2.4	9.8
5212	47	0.0605209	0.116438	28.894	36.575	1.25	9.11
5252	41	0.874686	1.49819	42.504	31.57	11.87	1.52
5252	43	0.413115	0.990813	45.224	81.207	6.04	11.49
5252	45	0.0747868	0.532	29.085	24.451	4.99	1.97
5252	47	0.0781878	0.346148	36.146	69.05	2.45	12.17
