# Supplementary material for: Difference in the recruitment of intrinsic foot muscles in the elderly under static and dynamic postural conditions
Source: PeerJ. 2023 Jul 19;11:e15719. doi: 10.7717/peerj.15719 (PMC10362842; doi:10.7717/peerj.15719)
Supplement: Supplemental Information 2 — All muscles’ activation is represented as normalized percentage values (NRMS). TA, Tibialis anterior; LG, Lateral head of gastrocnemius; MG, Medial head of gastrocnemius; PL, Peroneus longus; AbH, Abductor hallucis; FDB, Flexor digitorum brevis. [file peerj-11-15719-s002.xlsx]

## Sheet: Sheet1
Subject No.	conditions of SOT test	TA/us	LG/us	MG/us	AbH/us	PL/us	FDB/us
1031	11	0.0924077	0.211622	0.199047	0.139155	0.0532727	0.10021
1031	12	0.127469	0.257765	0.328522	0.168077	0.0635088	0.23792
1031	13	0.137444	0.260359	0.321461	0.165058	0.0738807	0.151093
1031	14	0.13254	0.238082	0.269369	0.127544	0.0561922	0.125955
1031	15	0.93141	0.384549	0.340332	0.315129	0.427166	0.401393
1031	16	0.544332	0.368335	0.360501	0.262175	0.277455	0.3292
1041	11	0.155911	0.244938	0.181798	0.407574	0.0790181	0.283493
1041	12	0.0721249	0.346216	0.236646	0.448222	0.104005	0.349452
1041	13	0.111594	0.306512	0.232613	0.533755	0.119248	0.316371
1041	14	0.0372423	0.211445	0.180901	0.403163	0.0742781	0.279755
1041	15	0.367515	0.344211	0.341923	0.561604	0.0923106	0.410411
1041	16	0.702157	0.320327	0.339033	0.445607	0.0946042	0.376632
1151	11	0.0352282	0.124278	0.0971276	0.110885	0.208051	0.183533
1151	12	0.0359302	0.119015	0.152115	0.126009	0.215045	0.337142
1151	13	0.0611221	0.115748	0.195001	0.227557	0.280177	0.449301
1151	14	0.030374	0.0697878	0.0850754	0.102827	0.173266	0.171506
1151	15	0.237752	0.322584	0.361857	0.283399	0.247251	0.484804
1151	16	0.0928568	0.137925	0.126915	0.117711	0.17927	0.272176
1161	11	0.0206045	0.216797	0.119174	0.0176919	0.0178024	0.0505741
1161	12	0.0201979	0.218117	0.0683203	0.0136758	0.0188258	0.0409457
1161	13	0.0230909	0.251012	0.142249	0.107059	0.0327405	0.124667
1161	14	0.0244748	0.29756	0.181508	0.134287	0.0568647	0.184091
1161	15	0.161179	0.224656	0.164158	0.0611532	0.0819849	0.116846
1161	16	0.0319814	0.446144	0.22189	0.138974	0.0686808	0.407371
1171	12	0.0366088	0.280771	0.595117	0.277141	0.0855908	0.288552
1171	13	0.0466319	0.470594	0.644699	0.338377	0.105127	0.27321
1171	14	0.0365491	0.223958	0.380424	0.180135	0.0952212	0.164616
1171	15	0.0749624	0.327087	0.591279	0.369156	0.0976903	0.409697
1171	16	0.145576	0.438207	0.655604	0.387221	0.117289	0.466165
1171	11	0.0378386	0.192117	0.551278	0.333368	0.0922443	0.137711
2101	12	0.0479956	0.49926	0.146149	0.141643	0.113555	0.0960229
2101	13	0.0454833	0.507367	0.183513	0.17368	0.11302	0.129471
2101	14	0.0473702	0.490934	0.211857	0.148742	0.1112	0.116561
2101	15	0.336428	0.397949	0.255616	0.148711	0.13283	0.125795
2101	16	0.224991	0.37936	0.159594	0.0331282	0.12248	0.0983689
2101	11	0.0474148	0.536239	0.147694	0.175813	0.118485	0.129292
2141	12	0.0187359	0.125004	0.149042	0.381167	0.123884	0.165359
2141	13	0.0195491	0.272254	0.2572	0.405442	0.11589	0.151974
2141	14	0.0266737	0.297531	0.225912	0.536685	0.183668	0.326208
2141	15	0.0971005	0.337787	0.310583	0.482739	0.18696	0.398129
2141	16	0.374017	0.296037	0.466931	0.503297	0.191386	0.277941
2141	11	0.0192222	0.0661542	0.103376	0.347838	0.122345	0.135765
2171	11	0.041538	0.0640063	0.0794369	0.0533966	0.0959312	0.034911
2171	12	0.0630939	0.0734613	0.107464	0.048244	0.111659	0.0317278
2171	13	0.0538955	0.0825663	0.120894	0.0834539	0.124702	0.153876
2171	14	0.0938444	0.0588262	0.0919161	0.0724191	0.127251	0.123572
2171	15	0.123408	0.319137	0.307727	0.195357	0.313062	0.428392
2171	16	0.0790681	0.246723	0.351736	0.34244	0.280858	0.516391
3091	11	0.0614226	0.253882	0.30836	0.258441	0.0417169	0.160269
3091	12	0.0687048	0.239707	0.0756208	0.159917	0.0383914	0.0936547
3091	13	0.0929605	0.230594	0.0963366	0.167962	0.0367798	0.117125
3091	14	0.515636	0.23919	0.129183	0.322933	0.0678793	0.154282
3091	15	0.753701	0.387311	0.646731	0.241064	0.10092	0.267636
3091	16	0.674795	0.290556	0.597211	0.34983	0.0737285	0.273871
3111	11	0.0217978	0.100973	0.044682	0.0185373	0.0143375	0.0689309
3111	12	0.0225783	0.113097	0.103585	0.065652	0.0167523	0.120002
3111	13	0.0800061	0.106906	0.159098	0.15141	0.0821606	0.306549
3111	14	0.0215791	0.106562	0.129933	0.0630448	0.0214381	0.124374
3111	15	0.143757	0.150146	0.211068	0.211633	0.115909	0.433164
3111	16	0.0311429	0.14621	0.159197	0.174798	0.0660084	0.213471
3141	12	0.0336218	0.268898	0.18632	0.019494	0.0235792	0.0330555
3141	13	0.0857446	0.445529	0.317442	0.0275848	0.043182	0.0409796
3141	14	0.0362282	0.353949	0.266501	0.0235229	0.0293278	0.0380767
3141	15	0.0547031	0.417362	0.331116	0.0290759	0.0301998	0.204414
3141	16	0.114741	0.425209	0.22148	0.091555	0.0301988	0.264437
3141	11	0.034208	0.283518	0.201133	0.0261765	0.0236126	0.0398116
4061	11	0.0903345	0.439641	0.52156	0.0621817	0.126772	0.12659
4061	12	0.139591	0.411372	0.321571	0.069624	0.126959	0.115091
4061	13	0.157199	0.432276	0.62424	0.079543	0.147661	0.344886
4061	14	0.0602538	0.254774	0.470223	0.132338	0.162539	0.337435
4061	15	0.310114	0.329372	0.415065	0.141897	0.254134	0.428189
4061	16	0.835222	0.657677	0.739288	0.762936	0.718152	1.76975
4131	12	0.0317321	0.205886	0.14247	0.109861	0.0708344	0.119838
4131	13	0.200119	0.197829	0.270159	0.106112	0.0611618	0.159112
4131	14	0.455153	0.106997	0.0560521	0.239605	0.0256426	0.213164
4131	15	1.9291	0.174496	0.107081	0.161618	0.111943	0.416739
4131	16	1.53198	0.181651	0.236469	0.294695	0.121742	0.304458
4131	11	0.0277115	0.114017	0.107838	0.0210528	0.0270745	0.021315
5042	11	0.0531843	0.0951853	0.0952251	0.0134509	0.0574494	0.038198
5042	12	0.0563324	0.172577	0.370868	0.0141504	0.0565169	0.044185
5042	13	0.0530836	0.137648	0.305564	0.016243	0.0624809	0.043456
5042	14	0.0843826	0.153961	0.357297	0.0163286	0.0719227	0.0441527
5042	15	0.0635348	0.321259	0.333255	0.153777	0.0742135	0.194237
5042	16	0.127488	0.545851	0.466842	0.327745	0.152819	0.328234
5062	12	0.0305842	0.114692	0.0896666	0.151589	0.127982	0.135405
5062	13	0.222716	0.0756494	0.066714	0.0678812	0.0622206	0.182693
5062	14	0.0435207	0.0861593	0.0737764	0.0433815	0.0588554	0.185479
5062	15	0.290937	0.175258	0.128049	0.110604	0.0832378	0.337938
5062	16	0.329135	0.0918524	0.0779201	0.052244	0.0739767	0.218119
5062	11	0.0320187	0.11003	0.085364	0.139232	0.156943	0.0864048
5082	12	0.0324703	0.290433	0.385832	0.329165	0.0608041	0.475844
5082	13	0.0333776	0.265596	0.320765	0.0514218	0.0750185	0.249594
5082	14	0.0367675	0.239295	0.328467	0.088895	0.070957	0.306551
5082	15	0.147576	0.431503	0.360444	0.140127	0.0603198	0.383114
5082	16	0.393288	0.438387	0.332312	0.203035	0.113793	0.868786
5082	11	0.0315462	0.325205	0.25798	0.263295	0.0565235	0.379836
5092	11	0.0388509	0.261826	0.0497463	0.107481	0.0598022	0.200234
5092	12	0.117235	0.200112	0.0446937	0.11947	0.0428263	0.398252
5092	13	0.0654354	0.228961	0.0820993	0.122482	0.0505294	0.436506
5092	14	0.0845282	0.278727	0.308118	0.359433	0.0597359	0.531023
5092	15	0.601021	0.287042	0.373808	0.484727	0.103829	0.72262
5092	16	0.933997	0.306581	0.373845	0.50739	0.216556	0.768388
5102	12	0.0962468	0.202845	0.28751	0.0724243	0.057827	0.0793092
5102	13	0.0579306	0.189327	0.272891	0.0210267	0.0469483	0.0740462
5102	14	0.0538746	0.209447	0.315205	0.192158	0.0499704	0.0537832
5102	15	0.291922	0.267428	0.28642	0.173426	0.107869	0.101427
5102	16	0.12258	0.401621	0.369818	0.281792	0.0996185	0.277905
5102	11	0.0441962	0.175246	0.265566	0.0202909	0.0442341	0.0501535
5132	12	0.157299	0.0866983	0.192391	0.0152774	0.060056	0.0623311
5132	13	0.690172	0.0896741	0.182124	0.0192435	0.0692251	0.0502715
5132	14	0.637925	0.0774376	0.194118	0.0137252	0.0519448	0.043017
5132	15	1.03149	0.151202	0.269555	0.0205735	0.113586	0.103193
5132	16	0.782744	0.204045	0.293231	0.0248023	0.0909759	0.0882152
5132	11	0.162721	0.104998	0.15282	0.0178881	0.0669197	0.0525938
5152	12	0.0138165	0.171581	0.147699	0.0138804	0.0448353	0.0511644
5152	13	0.0185304	0.182108	0.241095	0.0634499	0.137127	0.0918734
5152	14	0.0215772	0.201592	0.232467	0.0696705	0.182803	0.0874397
5152	15	0.030139	0.205739	0.307314	0.173294	0.241672	0.162889
5152	16	0.237349	0.225016	0.296232	0.129225	0.269394	0.195377
5152	11	0.0140298	0.1756	0.147803	0.0141488	0.0468354	0.0453558
5252	12	0.0412746	0.153647	0.201507	0.137598	0.0278129	0.231245
5252	13	0.04692	0.168516	0.20861	0.0896027	0.0343847	0.244047
5252	14	0.0811999	0.140897	0.180349	0.0567416	0.0454343	0.264136
5252	15	0.341629	0.181199	0.185866	0.118669	0.113791	0.538808
5252	16	0.105771	0.240255	0.252586	0.20892	0.0989104	0.476306
5252	11	0.0432054	0.128816	0.233147	0.0548589	0.0291568	0.360371
